# Supplementary material for: Electrochemical growth of octahedral Fe3O4 with high activity and stability toward the oxygen reduction reaction
Source: Royal Society of Chemistry journal article supplement (doi:10.1039/c5ta04450b), 2015-01-01
Supplement: c5ta04450b1.pdf [file c5ta04450b1.pdf]

## Supplementary Information

### Electrochemical growth of octahedral Fe<sub>3</sub>O<sub>4</sub> with high activity and stability toward oxygen reduction reaction

Xiaofeng Zhang, Xiaoying Wang, Lijuan Le, Ai Ma and Shen Lin\*

*College of Chemistry and Chemical Engineering, Fujian Normal University, Fuzhou, Fujian 350007, PR China.*

*E-mail: shenlin@fjnu.edu.cn*

#### Experiment section

##### Materials

Commercial 20% Pt/C catalyst was purchased from Alfa Aesar. Nafion® 117 solution was purchased from Aldrich. All other chemicals were of analytical grade and from Sinopharm Chemical Reagent Co., Ltd. Deionized water was used throughout the experiments.

##### Characterization

X-ray photoelectron spectroscopy (XPS) was performed at room temperature with monochromatic Al K $\alpha$  radiation (1486.6 eV) using a Quantum 2000 system (PHI, USA). X-ray diffraction (XRD) pattern was measured on an X'pert Pro diffractometer (Philips, USA), using Cu K $\alpha$  radiation. Field emission scanning electron microscopy (FE-SEM) images and energy dispersive spectroscopy (EDS) were observed on a JSM-7500F field emission scanning electron microanalyzer (JEOL, Japan). <sup>57</sup>Fe Mössbauer spectra of the as-prepared materials were recorded using a Topologic 500A spectrometer and a proportional counter at room temperature. The source was <sup>57</sup>Co in rhodium. The Mössbauer spectra was fitted by two overlapping six-line sub-spectra. One of the sub-spectra with larger magnetic splitting was assumed to have a static magnetic field, the other one with smaller magnetic splitting was assumed to have a distribution in its magnetic field. Accordingly, <sup>57</sup>Fe Mössbauer spectral parameters such as the isomer shift (*IS*), the electric quadrupole splitting (*QS*), the effective or average magnetic field (*H*), the full linewidth at halfmaximum (FWHM) and the relative spectral area (*A*) of different components on the

absorption patterns were calculated. The  $IS$  values were quoted relative to  $\alpha$ -Fe at room temperature. The magnetization of the sample was measured with a vibrating sample magnetometer (VersaLab, Quantum Design, USA) at room temperature. Indium tin oxide (ITO)-coated glass was used to deposit  $Fe_3O_4$  for surface characterization. SEM imaging, XPS analysis and hysteresis loop of as-deposited  $Fe_3O_4$  were carried out on the ITO substrate itself. For XRD measurement and Mössbauer spectra, the material is scrapped off from the ITO substrate and redispersed in 95% ethanol and drop dried on the Si substrate. As for TEM measurement, the as-deposited  $Fe_3O_4$  sample was removed carefully from the ITO electrode using ultrasonication in isopropanol and coating the TEM grids with a few microliters of the solution.  $Fe_3O_4$  loading on the glassy carbon disk electrode in electrochemical measurements was determined by Thermo 6300 Inductively Coupled Plasma-atomic (ICP) emission spectrometry. The ICP samples were prepared by immersing as-synthesized  $Fe_3O_4$  glassy carbon disk electrode in 0.1 M HCl.

### **Electrochemical measurements**

The electrochemical measurements were carried out in a conventional three electrode cell using CHI 660C electrochemical workstation. Prior to the deposition of the  $Fe_3O_4$  crystals onto the electrode surface for electrocatalytic assessment, the glassy carbon (GC) disk working electrode (5.0 mm diameter) was polished with alumina slurries (1.0, 0.3 and 0.5  $\mu\text{m}$ ) and cleaned by sonication in absolute alcohol and deionized water for 10 min successively. After the  $Fe_3O_4$  crystals were deposited onto the electrode surface, then the electrode was dried by a gentle nitrogen flow for 2 min. A Pt coil and double junction Ag/AgCl (3 M  $KNO_3$ ) acted as the counter and reference electrode, respectively. All potentials in this study refer to that of RHE. The potential difference between Ag/AgCl and RHE is  $0.962\pm 0.002$  V, based on the calibration measurement in  $H_2$  saturated 0.1M KOH with two polished Pt wires as the working and counter electrodes, respectively and the Ag/AgCl as the reference electrode. CVs were run at a scan rate of  $1\text{mV s}^{-1}$ , and the average of the two potentials at which the current crossed zero was taken to be the thermodynamic potential for the hydrogen electrode reactions.

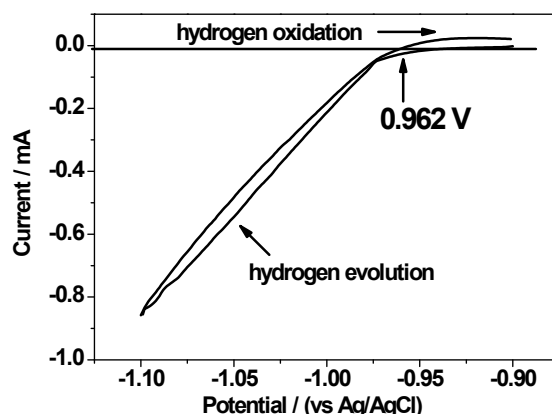

So in 0.1 M KOH,  $E(\text{RHE}) = E(\text{Ag/AgCl}) + 0.962 \text{ V}$ .

Cyclic voltammetry (CV) and linear sweep voltammetry (LSV) were carried out in a  $\text{N}_2$  and  $\text{O}_2$ -saturated 0.1 mol  $\text{L}^{-1}$  KOH solutions, with a scan rate of 50  $\text{mV s}^{-1}$  and 5  $\text{mV s}^{-1}$ , respectively. Electrolyte was saturated with oxygen by bubbling  $\text{O}_2$  prior to the start of each experiment. A flow of  $\text{O}_2$  was maintained over the electrolyte during the recording of CVs and LSVs in order to ensure its continued  $\text{O}_2$  saturation. The working electrode was cycled at least 5 times before data were recorded at a scan rate of 5  $\text{mV s}^{-1}$ . In control experiments, CV and LSV measurements were also performed in  $\text{N}_2$  by switching to  $\text{N}_2$  flow through the electrochemical cell. Chronoamperometry and methanol-tolerant tests were conducted at 0.56 V in 0.1 M KOH saturated with  $\text{O}_2$ . All electrochemical experiments were carried out at room temperature. The accelerated durability test was performed by cycling between 0.2 and -1.0 V for 10 000 cycles in  $\text{O}_2$ -saturated 0.1 mol  $\text{L}^{-1}$  KOH solution, with scan rate of 100  $\text{mV s}^{-1}$ . The kinetics of the ORR were studied by the RDE method with a CHI660C electrochemical workstation and Pine modulated speed rotator (USA). For comparison, 5 mg of Pt/C and 16  $\mu\text{L}$  of 5 wt % Nafion solution were dispersed in 1 ml of 3:1 v/v water/isopropanol mixed solvent by at least 30 min sonication to form a homogeneous ink. Then 2.4  $\mu\text{L}$  of the catalyst ink (containing 12  $\mu\text{g}$  of Pt/C) was loaded onto a glassy carbon electrode. The  $\text{Fe}_3\text{O}_4$  loading was 0.6  $\text{mg cm}^{-2}$  by ICP test and the Pt/C (20%) catalysts loading was controlled at 60  $\mu\text{g cm}^{-2}$ , respectively.

## Equations

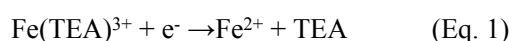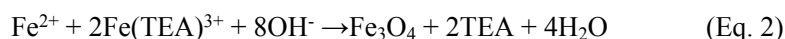

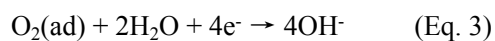

The kinetic parameters can be analyzed with the Koutecky–Levich equations (eq. 4 and 5):

$$\frac{1}{J} = \frac{1}{J_K} + \frac{1}{J_L} = \frac{1}{J_K} + \frac{1}{B\omega^{1/2}} \quad (\text{Eq. 4})$$

$$B = 0.62nFC_0D_0^{2/3}\nu^{-1/6} \quad (\text{Eq. 5})$$

Where  $J$  is the measured current density,  $J_K$  and  $J_L$  are the kinetic- and diffusion limiting current density, respectively,  $\omega$  is the electrode rotation rate,  $n$  is the overall number of electron transferred,  $F$  is the Faraday constant,  $C_0$  is the bulk concentration of  $\text{O}_2$  dissolved in the electrolyte,  $D_0$  is the diffusion coefficient for  $\text{O}_2$ ,  $\nu$  is the kinematic viscosity of the electrolyte, and  $k$  is the electron transfer rate constant.<sup>[1]</sup> According to Eq. 4 and eq. 5, the number of electrons transferred can be obtained from the slope and intercept of the Koutecky–Levich plots, respectively.

## Figures and Tables

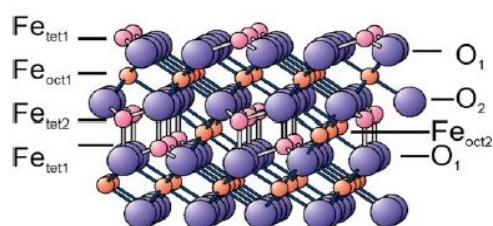

**Fig. S1** Side and top view of Fe<sub>3</sub>O<sub>4</sub>.<sup>[2]</sup>

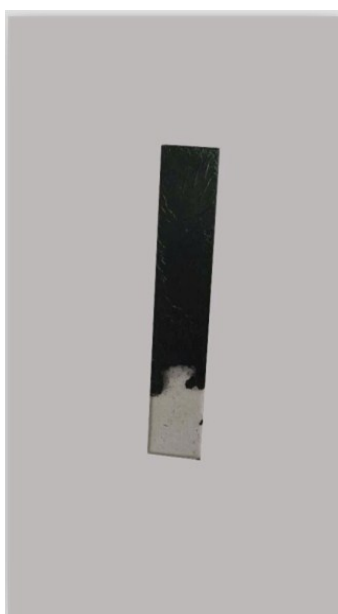

**Fig. S2** Photograph of the as-deposited product on ITO coated glass.

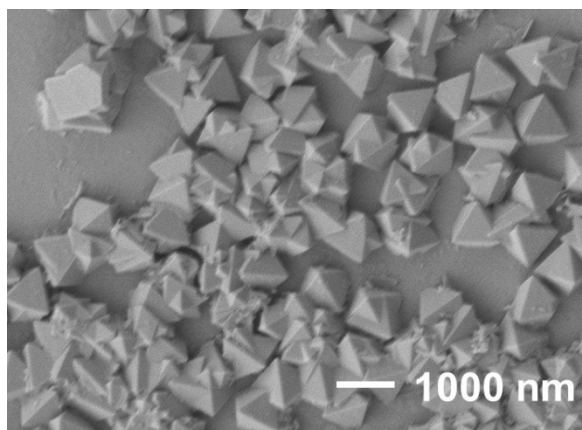

**Fig. S3** SEM image of the as-deposited product at lower magnification.

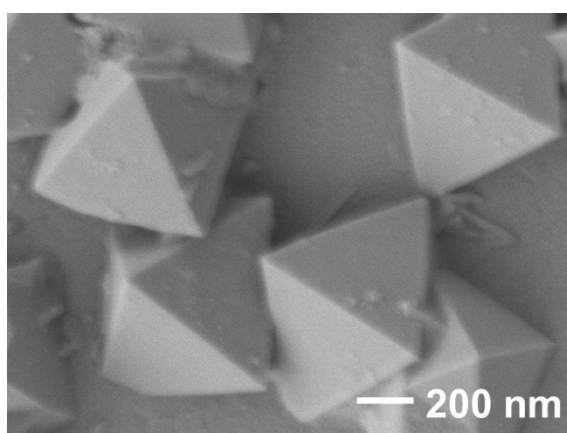

**Fig. S4** SEM image of the as-deposited product at higher magnification.

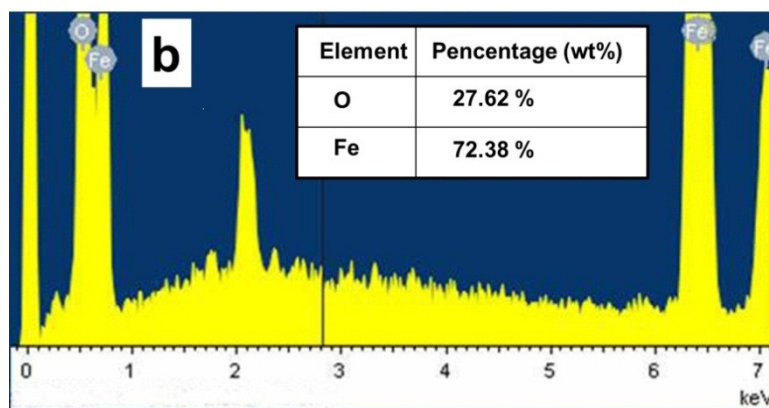

**Fig. S5** EDS image of the as-deposited product.

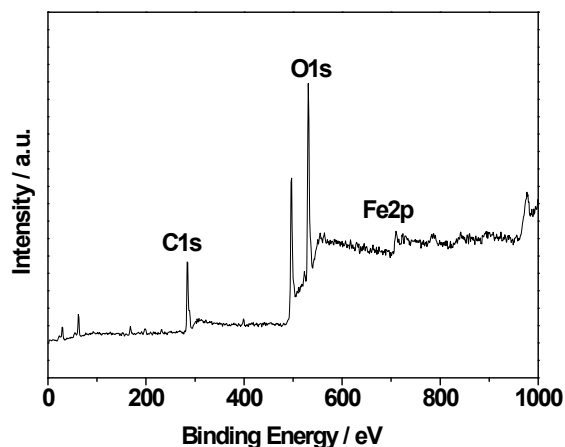

**Fig. S6** XPS spectra of full spectrum of as-synthesized product on ITO.

**Tab. S1** Physical parameters of different  $\text{Fe}_3\text{O}_4$ , Pt and PtPd catalysts

in 0.1 M saturated KOH with  $\text{O}_2$  at 1600rpm<sup>a</sup>

| Materials                              | Loading/mgcm <sup>-2</sup> | $J_{0.9V}$ /mAcm <sup>-2</sup> | $J_{0V}$ /mAcm <sup>-2</sup> | Onset /V <sup>b</sup> | Ref. <sup>c</sup> |
|----------------------------------------|----------------------------|--------------------------------|------------------------------|-----------------------|-------------------|
| octahedral $\text{Fe}_3\text{O}_4$     | 0.6                        | 0.20                           | 4.53                         | 0.90                  | This work         |
| Pt/C                                   | 0.06                       | 0.23                           | 5.02                         | 0.92                  | This work         |
| $\text{Fe}_3\text{O}_4/\text{N-C-900}$ | 0.15                       | 0.10 ~ 0.20                    | ~ 4.75                       | 0.85                  | Ref.5b            |
| $\text{Fe}_3\text{O}_4/\text{N-GAS}$   | 0.14                       | ~ 0.10                         | ~ 4.22                       | 0.81                  | Ref.5a            |
| PtPd/N-CNT                             | 0.20                       | ~ 0.40                         | ~ 6.80                       | 1.09                  | Ref.13            |

<sup>a</sup> All the potential values from references were converted to vs. RHE for comparison.

<sup>b</sup> In order to minimize the effect of residual currents on the potential value, the onset potential in this research has been defined as a potential required for generating an ORR current density of 0.1 mAcm<sup>-2</sup> in the LSV measurement.

<sup>c</sup> Ref. 5a , Ref. 5b and Ref. 13 are the cited references in the main text.

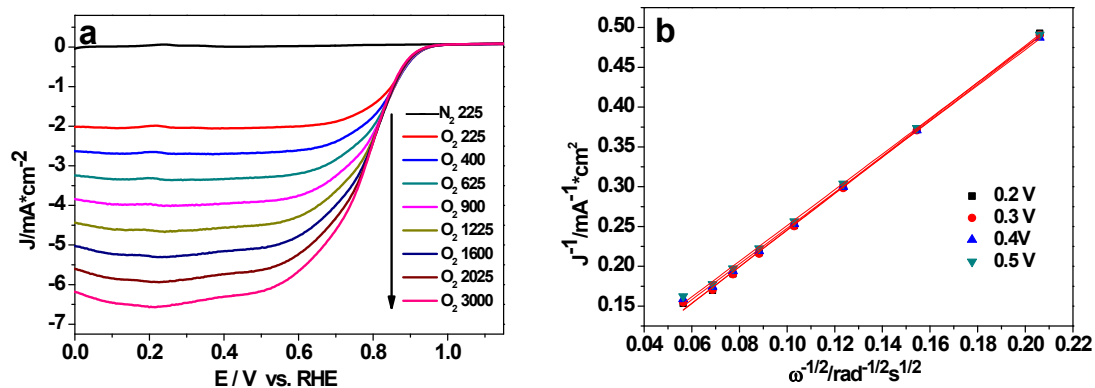

**Fig. S7** (a) LSV curves under different rotating speeds and (b) the calculated K–L plots of Pt/C.

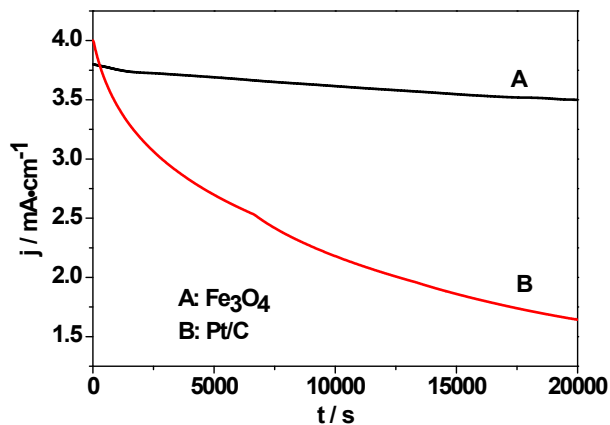

Fig. S8  $j$ - $t$  curves of  $\text{Fe}_3\text{O}_4$  and Pt/C at 0.56 V in 0.1 M KOH saturated with  $\text{O}_2$ .

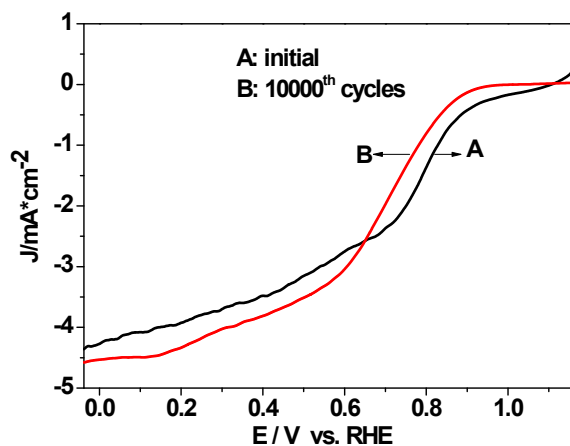

Fig. S9 ORR polarization curves of as-deposited  $\text{Fe}_3\text{O}_4$  catalyst before and after 10 000 cycles in 0.1 M KOH saturated with  $\text{O}_2$  at a rotating rate of 1600 rpm (scan rate:  $5 \text{ mV s}^{-1}$ ).

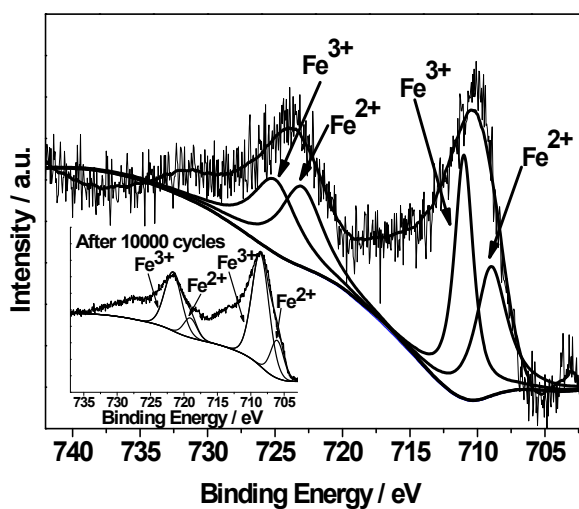

Fig.S10 Fe2p XPS spectra of as-deposited  $\text{Fe}_3\text{O}_4$  catalyst before and after 10,000 cycles stability test.

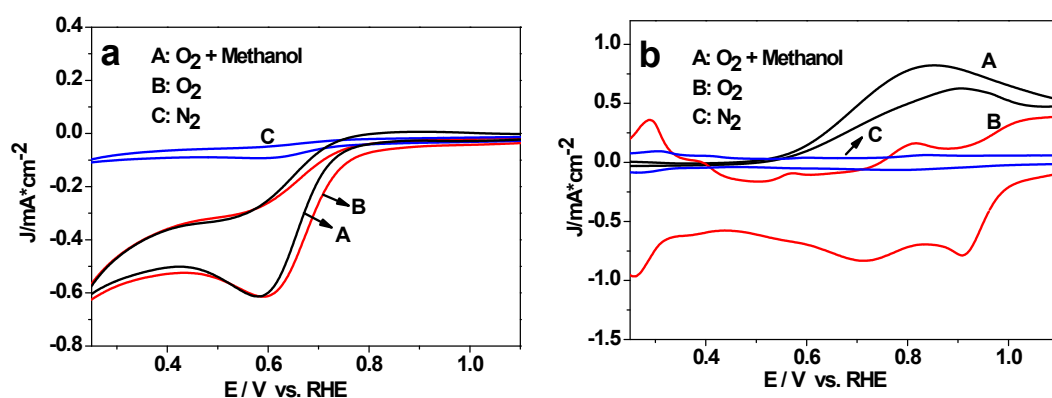

Fig. S11 (a) CV curves of as-deposited  $\text{Fe}_3\text{O}_4$  catalyst and (b) Pt/C catalyst in  $\text{O}_2$ -saturated 0.1M KOH solution with and without 10vol% methanol at a scan rate of  $10 \text{ mVs}^{-1}$ .

### References

- [1] Y. Lu, Y. Wang and W. Chen, *J. Power Sources*, 2011, **196**, 3033.
- [2] C. Lemire, R. Meyer, V. E. Henrich, Sh. Shaikhutdinov and H. J. Freund, *Surface Science*, 2004, **572**, 103.
